# Supplementary material
Source: Royal Society of Chemistry journal article supplement (doi:10.1039/d6ta01254j)
Supplement: d6ta01254j2.pdf [file d6ta01254j2.pdf]

1

## Supporting Information

2

3 **Graphite Paper Anode with Low Lattice Mismatch Enables Corrosion Inhibited Zinc**

4 **Batteries**

5

6 **Supplementary Fig. S1-11**

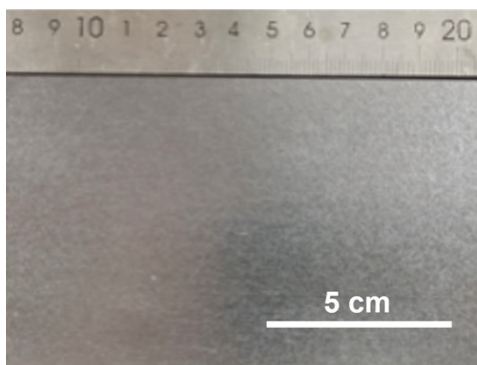

7  
8  
9

Fig. S1 Optical image of GP.

10

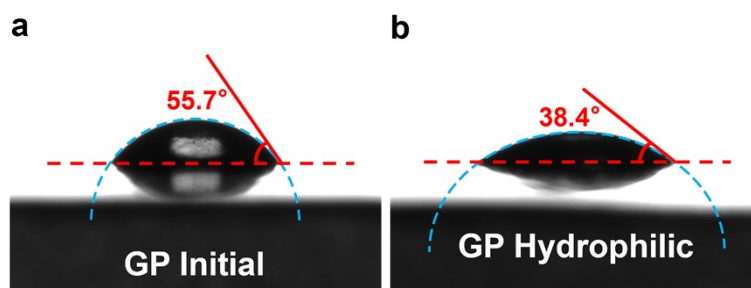

11

12

Fig. S2 Water contact angle of GP. (a) initial and (b) after vacuum plasma cleaning.

13

14

15

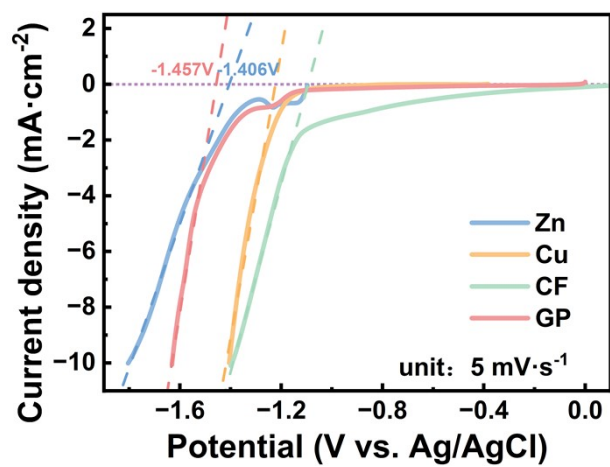

16

17 Fig. S3 LSV test of different materials in 7 M  $\text{CaCl}_2$  solution with a scan rate of  $5 \text{ mV}\cdot\text{s}^{-1}$ .

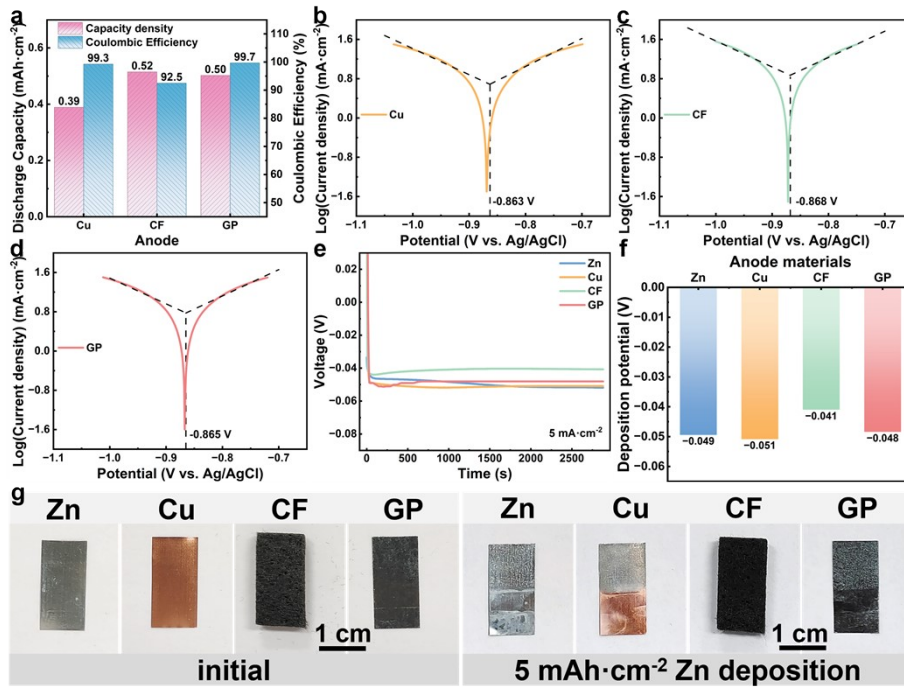

18

19 Fig. S4 (a) Discharge capacity curves and Coulombic efficiency curves of Cu, CF, and GP  
 20 anodes in a single CV cycle. Tafel curves and fitted corrosion potentials of (b) Cu, (c) CF and  
 21 (d) GP anodes. (e) Current-time curves and (f) Average deposition overpotentials of different  
 22 materials during deposition at 5 mA·cm<sup>-2</sup>. (g) Macroscopic optical images of different materials  
 23 after depositing 5 mAh·cm<sup>-2</sup> of Zn.

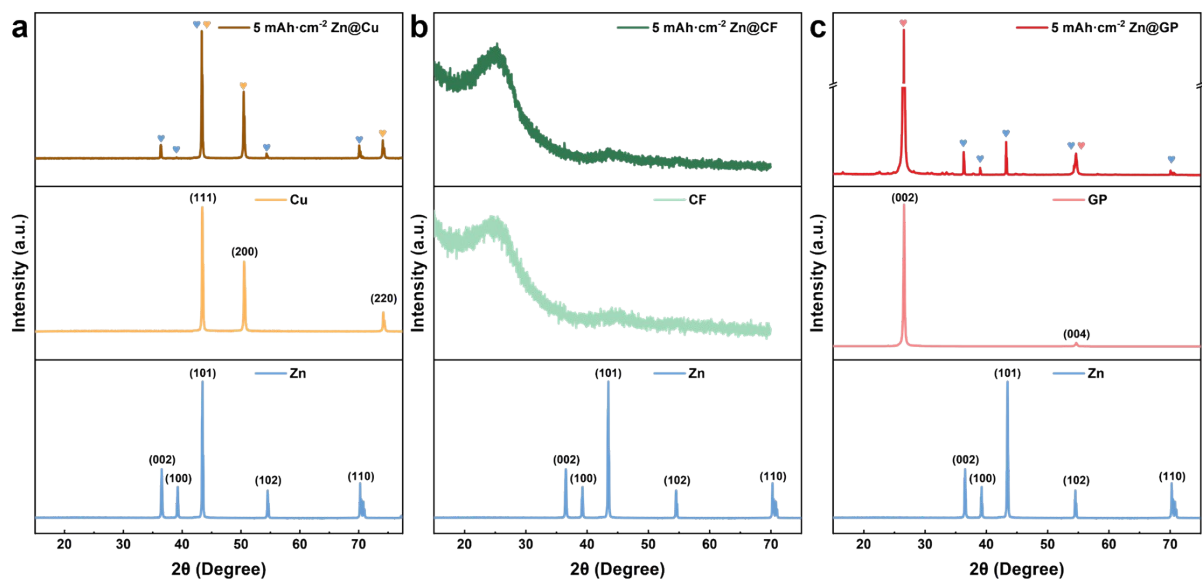

24

25 Fig. S5 (a-c) XRD patterns of Cu, GP, CF, as well as Zn@Cu, Zn@CF, and Zn@GP loaded  
 26 with  $5 \text{ mAh}\cdot\text{cm}^{-2}$  of Zn.

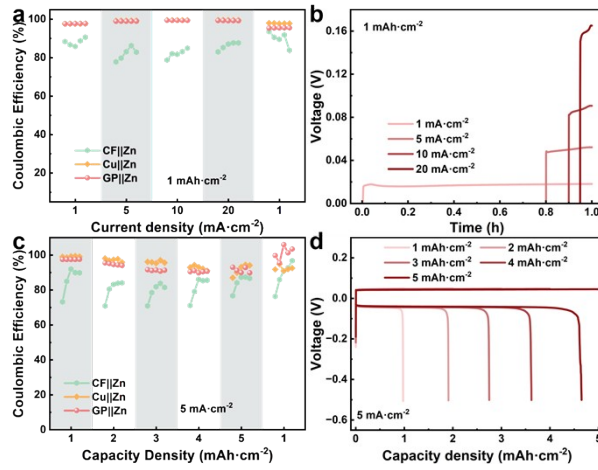

27

28 Fig. S6 (a) Current rate performance of GP||Zn, Cu||Zn, CF||Zn half-cells. (b) Deposition  
 29 potential curves of GP|| Zn half-cell during current rate performance test. (c) Capacity rate  
 30 performance of GP||Zn, Cu||Zn, CF||Zn half-cells. (d) Voltage-capacity curves of GP||Zn half-  
 31 cell during capacity rate performance test.

32

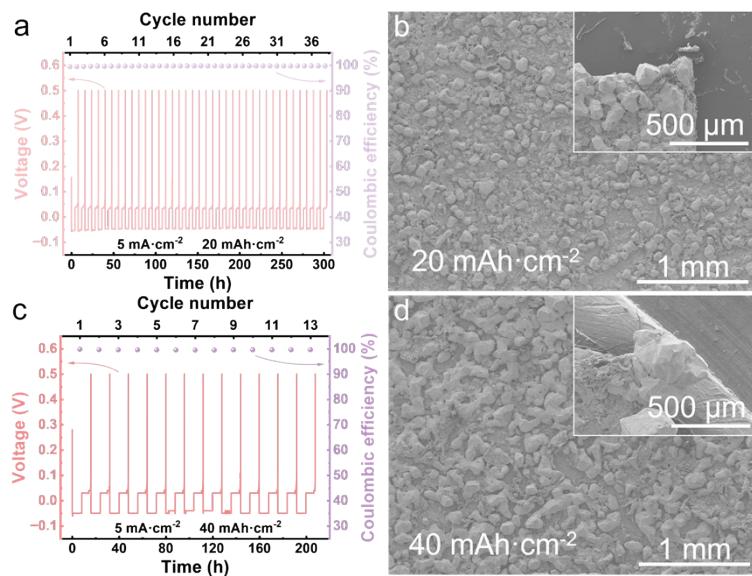

33

34 Fig. S7 (a) Deposition/dissolution performance and (b) SEM image at an areal capacity density  
 35 of 20 mAh·cm<sup>-2</sup>; (c) Deposition/dissolution performance and (d) SEM image at an areal  
 36 capacity density of 40 mAh·cm<sup>-2</sup>.

37

38

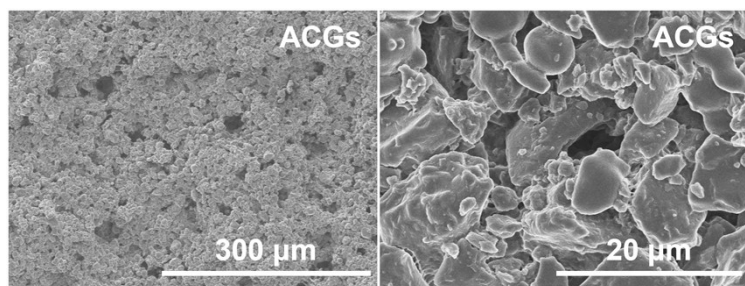

39

40

41

Fig. S8 SEM images of ACGs cathode at different magnification.

42

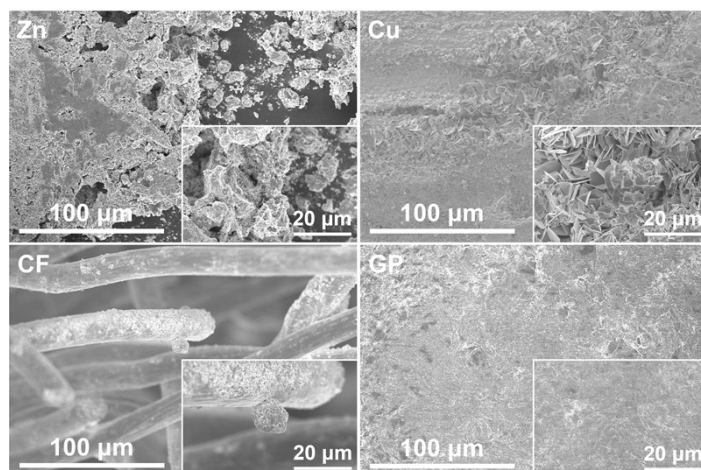

43

44 Fig. S9 SEM images of deposition/dissolution-type Zn-I<sub>2</sub> full cells with Cu, Zn, CF, and GP as  
45 anode after 150 cycles.

46

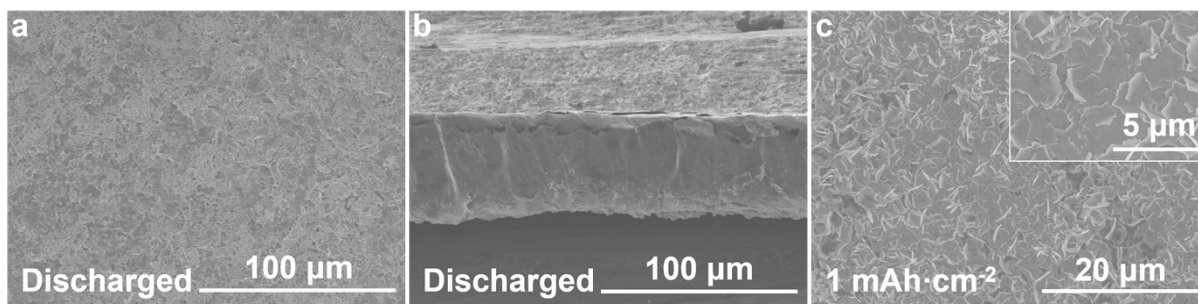

47  
48 Fig. S10 (a) Surface and (b) cross-sectional SEM images of the full cell based GP anode after  
49 500 cycles in a fully discharged state; (c) surface SEM image of the full cell after being charged  
50 to  $1 \text{ mAh}\cdot\text{cm}^{-2}$ .

51

52

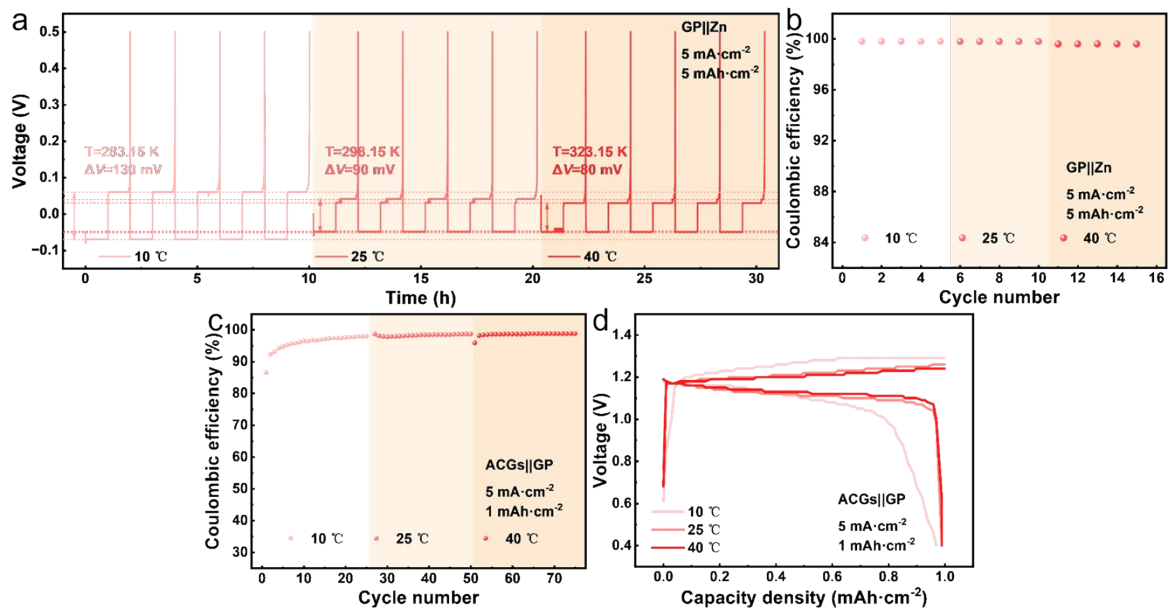

53  
 54 Fig. S11 (a-b)Half-cell deposition/dissolution performance and (c-d)full-cell cycling  
 55 performance at different temperatures.

56

57

58

**Supplementary Table S1-3**

59 Table. S1 Electrical conductivity , density and specific surface areas of different materials.

| Anode Materials | $\sigma(\text{S}\cdot\text{m}^{-1})$ | $\rho(\text{g}\cdot\text{cm}^{-3})$ | specific surface areas( $\text{m}^2\cdot\text{g}^{-1}$ ) |
|-----------------|--------------------------------------|-------------------------------------|----------------------------------------------------------|
| <b>Cu</b>       | $5.96\times 10^7$                    | 8.96                                | $18.6\times 10^{-3}$                                     |
| <b>Zn</b>       | $1.69\times 10^{7z}$                 | 7.14                                | $5.6\times 10^{-3}$                                      |
| <b>GP</b>       | $1.23\times 10^5$                    | 1.46                                | $27.4\times 10^{-3}$                                     |
| <b>CF</b>       | $5.04\times 10^2$                    | 0.184                               | $7^1$                                                    |

60

61 Table. S2 Capacity density and cycle lifespan of full cells under different strategies.

| Strategy                                                                    | Capacity density             | Lifetime                                | Refs.                                         |
|-----------------------------------------------------------------------------|------------------------------|-----------------------------------------|-----------------------------------------------|
| <b>GP anode, ACGs cathode</b>                                               | <b>1 mAh·cm<sup>-2</sup></b> | <b>10000</b><br><b>(99.16% avg. CE)</b> | <b>This work</b><br><b>(Zn-I<sub>2</sub>)</b> |
|                                                                             | <b>3 mAh·cm<sup>-2</sup></b> | <b>2500</b><br><b>(98.22% avg. CE)</b>  |                                               |
| silk protein additive                                                       | 1.576 mAh·cm <sup>-2</sup>   | 6000<br>(91.1% retained)                | Zn-I <sub>2</sub> <sup>2</sup>                |
| MXene cathode,<br>n-butanol electrolyte additive,<br>in-situ SEI protection | 0.30 mAh·cm <sup>-2</sup>    | 30000<br>(88% retained)                 | Zn-I <sub>2</sub> <sup>3</sup>                |
| backside coated Zn foil                                                     | 1.7 mAh·cm <sup>-2</sup>     | 2000<br>(58.1% retained)                | Zn-NVO <sup>4</sup>                           |
| self-assembled<br>supramolecular bilayer                                    | 3.2 mAh·cm <sup>-2</sup>     | 500<br>(64.7% retained)                 | Zn-Mn <sup>5</sup>                            |

62

63 Table. S3 Cost and cycle life of the different electrode materials used in this study.

| Materials | Thickness ( $\mu\text{m}$ ) | Price (USD·m <sup>-2</sup> ) | Cycle lifetime |
|-----------|-----------------------------|------------------------------|----------------|
| GP        | 50                          | 1.79                         | 10,000         |
| Zn foil   | 50                          | 23.81                        | 521            |
| Cu foil   | 12                          | 1.85                         | 1,036          |

64

65

66

67 **References**

68 1 M. Schnucklake, L. Ka Ner, M. Mehring and C. Roth, *RSC Adv.*, 2020, **10**, 41926-41935.

69 2 S.J. Zhang, J. Hao, H. Wu, Q. Chen, C. Ye and S.Z. Qiao, *Adv. Mater.*, 2024, **36**, 2404011.

70 3 W. Yan, Y. Liu, J. Qiu, F. Tan, J. Liang, X. Cai, C. Dai, J. Zhao and Z. Lin, *Nat. Commun.*,

71 2024, **15**, 9702.

72 4 N. Yang, Y. Gao, F. Bu, Q. Cao, J. Yang, J. Cui, Y. Wang, J. Chen, X. Liu and C. Guan, *Adv.*

73 *Mater.*, 2024, **36**, 2312934.

74 5 S. Chen, Y. Xia, R. Zeng, Z. Luo, X. Wu, X. Hu, J. Lu, E. Gazit, H. Pan, Z. Hong, M. Yan,

75 K. Tao and Y. Jiang, *Sci. Adv.*, 2024, **10**, n2265.

76

77
